# Supplementary material for: Large cation ethylammonium incorporated perovskite for efficient and spectra stable blue light-emitting diodes
Source: PubMed Central journal article supplement (PMC7441179; doi:10.1038/s41467-020-17943-6), 2020-08-20
Supplement: 41467_2020_17943_MOESM2_ESM.pdf [file 41467_2020_17943_MOESM2_ESM.pdf]

## **Description of Additional Supplementary Files**

File Name:Supplementary Movie 1

Description: The video shows the electroluminescence emission of our LED at a constant current density of  $0.3 \text{ mA}\cdot\text{cm}^{-2}$  for about 12 minutes. The emission color is constant, the spectra is stable from the electroluminescence results.
